# Supplementary material for: Aberrant Expression of Collagen Gene Family in the Brain Regions of Male Mice with Behavioral Psychopathologies Induced by Chronic Agonistic Interactions
Source: Biomed Res Int. 2019 Apr 28;2019:7276389. doi: 10.1155/2019/7276389 (PMC6512038; doi:10.1155/2019/7276389)
Supplement: Supplementary Materials — Additional Files: Supplement 1 (S1): detailed description of differentially expressed Col genes specific for brain regions of male mice with repeated experience of agonistic interactions (Tables 1-6). S1 Table 1: list of analyzed Col genes. S1 Results: additional statistics for differentially expressed Col genes in brain regions of male mice with repeated experience of agonistic interactions. S1 Table 2: differentially expressed Col genes in brain regions of male mice with repeated experience of agonistic interactions. S1 Table 3: differentially expressed Col genes in the hippocampus, striatum, and hypothalamus of male mice with repeated experience of agonistic interactions. S1 Table 4: differentially expressed Col genes in the midbrain raphe nuclei and VTA in male mice with repeated experience of agonistic interactions. S1 Table 5: overlapping and specific differentially expressed genes in brain regions of mice with repeated experience of aggression. S1 Table 6: overlapping and specific differentially expressed genes in brain regions of mice with repeated experience of defeats. S1 Table 7: comparison of Col gene expression (FPKM units) in the winners versus losers. Supplement 2 (S2): S2 Table 1: FPKM values for 49 Col transcripts analyzed in the study. [file 7276389.f1.zip]

Archive with 2 entries (2 files):
- S1 Tables 1-7_BMRI_2744818.doc
- S2, Table 1_BMRI_2744819.xls
