# Supplementary material for: Aberrant Expression of Collagen Gene Family in the Brain Regions of Male Mice with Behavioral Psychopathologies Induced by Chronic Agonistic Interactions
Source: Biomed Res Int. 2019 Apr 28;2019:7276389. doi: 10.1155/2019/7276389 (PMC6512038; doi:10.1155/2019/7276389)
Supplement: Supplementary Materials — Additional Files: Supplement 1 (S1): detailed description of differentially expressed Col genes specific for brain regions of male mice with repeated experience of agonistic interactions (Tables 1-6). S1 Table 1: list of analyzed Col genes. S1 Results: additional statistics for differentially expressed Col genes in brain regions of male mice with repeated experience of agonistic interactions. S1 Table 2: differentially expressed Col genes in brain regions of male mice with repeated experience of agonistic interactions. S1 Table 3: differentially expressed Col genes in the hippocampus, striatum, and hypothalamus of male mice with repeated experience of agonistic interactions. S1 Table 4: differentially expressed Col genes in the midbrain raphe nuclei and VTA in male mice with repeated experience of agonistic interactions. S1 Table 5: overlapping and specific differentially expressed genes in brain regions of mice with repeated experience of aggression. S1 Table 6: overlapping and specific differentially expressed genes in brain regions of mice with repeated experience of defeats. S1 Table 7: comparison of Col gene expression (FPKM units) in the winners versus losers. Supplement 2 (S2): S2 Table 1: FPKM values for 49 Col transcripts analyzed in the study. [file 7276389.f1.zip › S2, Table 1_BMRI_2744819.xls]

## Sheet: FPKM genes
		S2 Table 1. FPKM values for Col* transcripts analyzed in the study.
			HPC	HPC	HPC	HPC	HPC	HPC	HPC	HPC	HPC	HPT	HPT	HPT	HPT	HPT	HPT	HPT	HPT	HPT	STR	STR	STR	STR	STR	STR	STR	STR	STR	MRN	MRN	MRN	MRN	MRN	MRN	MRN	MRN	MRN	VTA	VTA	VTA	VTA	VTA	VTA	VTA	VTA	VTA
		Genes	HPC C1	HPC C2	HPC C3	HPC W1	HPC W2	HPC W3	HPC L1	HPC L2	HPC L3	HPT C1	HPT C2	HPT C3	HPT W1	HPT W2	HPT W3	HPT L1	HPT L2	HPT L3	STR C1	STR C2	STR C3	STR W1	STR W2	STR W3	STR L1	STR L2	STR L3	MRN C1	MRN C2	MRN C3	MRN W1	MRN W2	MRN W3	MRN L1	MRN L2	MRN L3	VTA C1	VTA C2	VTA C3	VTA W1	VTA W2	VTA W3	VTA L1	VTA L2	VTA L3
		Col1a1	4.74146	3.91384	2.83792	2.98989	4.53154	3.24978	4.81676	7.75936	6.01558	3.70581	5.84256	7.09697	4.77129	5.79266	10.2382	4.29679	4.45413	6.30595	1.69505	1.21891	1.97283	1.67277	2.24182	1.65341	1.71445	5.91674	3.04865	1.91874	2.36843	3.48002	2.08301	2.56066	1.95736	2.4929	3.07128	2.28917	2.817	4.55431	1.92868	2.02357	2.06527	2.63776	2.7927	2.5347	2.00636
		Col1a2	7.2927	4.65923	2.39901	3.51822	7.51373	3.85314	7.33078	8.2668	4.20168	8.84295	11.0445	15.2679	10.9034	10.7068	19.0503	8.73866	7.88665	9.51616	3.52604	1.95161	2.54491	2.7978	2.7974	2.18974	2.78046	9.46091	2.78625	5.18442	6.32839	6.3769	5.22312	5.61146	5.52905	5.88481	6.16325	5.7129	6.52508	8.69759	3.28557	4.18965	4.26882	5.60942	4.50326	4.26685	3.08972
		Col2a1	3.07011	3.29797	3.61017	2.34563	2.61536	2.63335	3.58167	3.59766	2.97147	5.6091	5.15112	5.82192	5.80256	7.57155	6.2038	5.71968	6.85057	6.76909	3.6709	2.93381	3.84793	4.33752	2.9484	3.77809	3.78	3.66582	3.66594	4.9664	4.31065	4.64243	4.51796	4.1024	3.20328	3.45295	4.80686	3.78716	3.71037	4.7594	4.25545	4.39178	3.08348	3.99756	5.04681	3.88146	3.22154
		Col3a1	0.986539	0.63777	0.456384	0.56383	1.04054	0.7155	1.52427	1.56215	1.78097	1.16657	2.06273	3.74981	1.93405	1.77521	4.38136	1.27227	1.57879	1.82172	0.336132	0.546097	0.440437	0.402298	0.583895	0.33112	0.386685	1.52216	1.01865	0.589697	0.561536	0.609158	0.637554	0.781187	0.549095	0.653539	0.74395	0.738967	0.610724	0.981361	0.699393	0.769293	0.60719	0.76148	0.818929	0.922752	0.771276
		Col4a1	10.5458	14.8989	14.0106	8.49361	12.0889	12.1333	11.5336	16.9662	16.9959	10.0562	11.8994	13.0842	10.5266	16.4451	16.247	11.7354	15.4949	18.4377	6.39089	7.26822	7.52385	5.43854	9.78896	7.17177	5.59214	11.2689	7.7952	6.77354	9.80486	11.0562	6.39133	8.60399	8.07715	6.48119	8.99852	7.00358	8.73073	14.1983	8.69294	6.04252	7.29668	8.1646	6.86259	10.3386	7.02056
		Col4a2	14.9566	20.3417	20.4319	11.5374	16.7784	18.2587	16.1301	22.711	22.2397	18.3242	23.3476	25.7946	21.2817	33.9035	30.9062	23.7447	31.8457	39.1632	8.42603	9.2151	10.8186	8.13391	12.71	9.26163	7.26689	14.8157	9.59909	10.2619	15.9635	17.3092	10.7245	14.7571	13.1128	11.0953	16.013	11.3077	12.507	22.1598	16.2262	11.47	13.2814	15.1771	14.187	18.9627	14.2892
		Col4a3	0.28446	0.218238	0.0363804	0.0825653	0.357306	0.0602642	0.184782	0.523781	0.0888851	0.162065	0.252634	0.425123	0.290349	0.295027	0.322153	0.212307	0.335606	0.398806	0.0632981	0.0887709	0.0683206	0.0715638	0.0817374	0.0791851	0.0777452	0.718574	0.139202	0.132739	0.185937	0.1016	0.104259	0.148267	0.195175	0.106488	0.140324	0.25263	0.239973	0.246539	0.146635	0.183088	0.145907	0.250162	0.165793	0.20468	0.242891
		Col4a4	0.386921	0.208333	0.130691	0.0572075	0.441961	0.0856445	0.291329	0.647068	0.109165	0.311005	0.375538	0.362218	0.253976	0.310937	0.458807	0.284943	0.310393	0.373735	0.0810085	0.0754784	0.0671266	0.0796587	0.0702703	0.0729387	0.104037	1.00329	0.0439615	0.211122	0.235971	0.158544	0.15405	0.209773	0.177664	0.119834	0.169878	0.193321	0.182895	0.262028	0.236369	0.241931	0.186089	0.252115	0.224737	0.22624	0.302037
		Col4a5	1.08574	0.90184	0.766388	0.797563	1.05437	0.851734	0.975477	1.3671	0.760065	1.45111	1.54406	1.7884	1.82583	2.06395	2.31504	1.59075	1.93913	1.99422	0.654678	0.740612	0.980794	0.611039	1.0609	0.747513	0.643115	2.0291	0.728659	1.13064	1.74926	1.37949	1.0645	1.4913	1.44074	1.26856	1.36833	1.2925	1.33025	1.57195	1.02102	0.900135	1.14019	1.45919	1.01346	1.31173	1.08778
		Col4a6	0.327134	0.336406	0.225395	0.196532	0.332885	0.348101	0.218219	0.549218	0.33492	0.492439	0.465864	0.670013	0.602119	0.617482	0.969667	0.444697	0.428802	0.542784	0.196913	0.23157	0.237631	0.169896	0.153994	0.172137	0.143936	0.353522	0.345834	0.187147	0.260484	0.288422	0.191041	0.239799	0.194671	0.177585	0.191742	0.183764	0.365438	0.197886	0.239072	0.175363	0.226906	0.230322	0.162705	0.222472	0.237605
		Col5a1	1.53763	3.28525	2.06088	1.9256	1.6767	3.10748	4.38481	6.85723	5.24196	0.867378	1.18151	1.96278	1.23383	1.44949	2.36978	1.13729	1.29154	1.43816	0.759535	0.426292	0.593777	0.867133	0.63659	0.663434	1.38673	1.87689	1.3158	1.03035	1.40606	1.14154	0.637066	1.54709	1.67905	1.61403	0.994789	1.19384	1.23018	1.62233	0.727692	0.727078	0.892505	1.36658	0.93599	1.31747	0.740448
		Col5a2	1.58345	1.73996	1.57083	1.42472	1.62841	2.08986	2.38547	2.48367	2.1623	2.00833	1.93563	2.86565	2.35795	2.4249	2.4575	1.79492	2.45281	2.90065	0.824184	0.917177	1.0899	0.640811	1.10826	0.713358	0.912609	1.14049	0.603636	1.69742	2.10947	2.06754	1.34568	2.06201	1.53517	1.56701	2.29067	2.23869	1.46484	1.82858	1.11123	0.999013	0.90211	1.18132	0.745796	0.895904	1.03114
		Col5a3	0.600305	1.45146	1.3925	0.55776	1.0181	1.16121	0.994933	1.07227	1.39253	1.98192	1.97326	2.92164	2.25116	3.46576	3.29196	2.67517	3.45286	4.15473	0.689338	0.954202	1.06733	1.03969	1.36264	1.01845	0.785166	2.28096	1.17152	1.62515	3.32202	2.73084	2.12277	2.52401	1.94097	2.03348	3.1412	2.01491	2.23234	3.76993	2.17076	1.37688	1.93495	2.23934	2.08441	2.2791	1.50047
		Col6a1	3.87288	6.96279	6.1544	3.25158	3.69649	11.4628	15.8959	11.5567	9.52882	4.80961	6.05638	7.7164	5.46605	7.15116	9.18007	6.10222	5.79938	8.02488	40.8547	44.9534	55.4453	38.0769	68.9597	41.3793	33.6838	21.4472	39.38	2.36278	2.65468	3.54235	2.38473	3.88522	3.74781	3.66434	4.72974	3.44249	2.62251	3.46513	3.15849	2.30918	2.03824	2.80352	2.69499	3.38258	3.315
		Col6a2	1.39488	2.62548	2.42887	1.47109	1.29822	3.38974	4.45916	5.98733	4.61385	3.68698	4.55298	6.21826	4.72759	5.3576	7.88005	4.12442	5.29766	7.043	5.3045	5.78291	6.61893	5.47746	8.97704	7.10234	5.2109	4.22852	6.4486	1.18876	1.97298	1.65194	1.00936	1.1435	1.19404	1.05235	1.54014	1.11511	1.28925	1.96962	1.63551	1.11078	1.09722	1.5263	1.39772	1.93181	1.31908
		Col6a3	0.51251	0.926827	0.54627	0.442313	0.583965	2.85758	0.468458	0.64623	0.706172	1.40744	1.3122	1.70567	1.63975	1.58291	2.00816	1.67264	1.89363	2.24819	1.24437	0.214836	0.275016	1.52636	0.398293	0.377468	0.401827	1.03387	0.511881	0.633395	0.643419	1.30481	1.25389	1.34569	1.0891	0.966137	1.40818	1.1213	1.25993	1.59145	1.28151	1.30435	1.18239	1.45907	1.26692	1.57736	1.20997
		Col6a4	1.25656	1.01635	0.345668	2.44943	1.84127	1.54939	0.227161	0.125743	0.304065	0.94285	0.566846	0.457096	1.26394	0.929317	0.788406	0.618177	0.594941	0.512305	3.97721	1.93348	1.74084	3.95545	4.84484	4.12564	2.11819	0.547466	1.0598	0.369943	0.332543	0.0560997	0.29793	0.435634	0.415546	0.173116	0.0625652	0.136982	0.22933	0.406296	0.112144	0.339587	0.312837	0.500614	0.124206	0.104363	0.209244
		Col6a5	0.139169	0.13754	0.126104	0.0987811	0.228044	0.278522	0.201276	0.0854383	0.173448	0.648064	0.539509	0.43389	0.56777	0.596145	0.498206	0.449596	0.734381	0.568975	0.362076	0.738488	0.65958	0.594021	0.780714	0.500158	0.34388	0.38454	0.373754	0.0236776	0.0318275	0.0939126	0.0708467	0.0548193	0.0689794	0.0848261	0.0617651	0.0538881	0.0961438	0.105178	0.214605	0.193783	0.191927	0.074811	0.145151	0.134012	0.0617412
		Col6a6	0.126188	0.0483716	0.11088	0.104016	0.103714	0.102712	0.0930099	0.100164	0.188527	0.262841	0.594764	0.693149	0.506075	0.392947	0.536635	0.426854	0.517711	0.613049	0.0958247	0.0249716	0.0271698	0.0941175	0.0664309	0.0563115	0.0562347	0.0998986	0.0404037	0.133582	0.0671637	0.14415	0.107071	0.0919825	0.0821833	0.118167	0.171076	0.112534	0.0873219	0.104041	0.18424	0.185931	0.068414	0.0448478	0.144005	0.207946	0.181113
		Col7a1	0.749423	0.667464	0.628973	0.547982	0.63014	0.748221	0.744506	0.67184	0.720122	0.9687	1.20487	1.22496	1.30632	1.73764	1.63844	1.3144	1.39532	2.51971	0.773535	0.842337	0.808724	0.709756	1.01846	0.807827	0.572423	0.83056	0.600872	0.473238	0.675734	0.452391	0.521896	0.55977	0.654471	0.359162	0.518294	0.390449	0.469492	1.03677	0.702289	0.719999	0.561141	0.611954	0.700314	0.924498	0.573137
		Col8a1	2.85879	1.56353	0.202563	0.180461	3.20644	0.147493	1.91238	2.74482	0.169198	1.42598	1.40291	1.59321	1.34841	1.04615	1.47531	1.4703	1.05605	1.32192	0.215364	0.210576	0.468189	0.228379	0.140033	0.293931	0.428206	5.20503	0.283907	0.422401	0.424731	0.563141	0.664775	0.508022	0.462225	0.441787	0.435017	0.582624	0.551013	0.649804	1.19328	0.944668	0.692222	0.390763	0.806731	0.642874	1.06111
		Col8a2	5.29678	3.27285	0.518643	0.449861	5.16309	0.929265	3.10468	4.83163	0.583293	1.69482	1.34837	1.85786	1.28427	1.88638	1.87996	1.38682	1.6599	2.2777	0.737083	1.36287	2.04073	1.28368	1.77563	1.10199	1.10282	8.54955	0.877489	0.206593	0.350626	0.328633	0.392514	0.434819	0.526091	0.353697	0.449086	0.484819	0.229515	0.366918	0.398179	0.227941	0.137147	0.16483	0.382962	0.434216	0.185501
		Col9a1	0.166711	0.23056	0.158542	0.207768	0.197727	0.675028	0.193624	0.179026	0.143463	0.255553	0.253093	0.308775	0.170227	0.279067	0.287983	0.172813	0.338117	0.352454	0.269272	0.0595157	0.110272	0.277199	0.211084	0.153369	0.226705	0.38443	0.173322	0.267012	0.240088	0.243086	0.323324	0.241223	0.300079	0.320768	0.23296	0.239948	0.254615	0.330395	0.567883	0.528067	0.244558	0.192385	0.533791	0.445814	0.4234
		Col9a2	2.34218	2.89557	2.35337	1.74735	2.01183	2.40291	2.26961	5.50671	2.33087	11.0513	15.9743	19.2344	14.4588	25.6773	22.72	14.113	15.8941	29.8971	2.43461	2.45132	3.05785	2.66024	4.83271	3.24079	1.87329	6.87942	3.23383	3.00364	5.15547	5.99859	5.78786	7.29695	5.82636	5.07481	8.1421	5.10934	5.86076	9.38598	9.2213	5.63048	6.4695	5.89256	6.83757	9.27449	6.31325
		Col9a3	15.3044	13.9171	3.87719	3.58914	20.4604	6.60055	14.0724	19.0808	4.49291	4.01332	4.90533	5.40445	4.76109	7.7923	6.79959	5.06097	6.10093	9.73604	6.97064	5.56123	7.40068	6.96938	10.7479	6.87553	7.71721	39.7502	7.16983	4.51845	6.3775	6.67352	5.72305	6.24503	4.87597	4.55529	7.73778	4.58551	5.90156	10.1358	5.26744	4.19481	5.07313	4.96229	5.77259	6.67428	4.65558
		Col10a1	0.0242707	0.0569902	0.0261258	0.0429902	0	0.02473	0.0242944	0.0295013	0.0567386	0.0241959	0.0250239	0.0508821	0.0643519	0.0197086	0	0.0541996	0.0590224	0.0498077	0.0342825	0.019615	0	0.0152177	0	0.0379101	0	0.0543188	0	0.0456475	0.0395634	0.0515024	0.015543	0.0340718	0.032979	0.0476956	0	0.0418663	0	0.027238	0.0702018	0.0157445	0.01612	0.0634053	0.0223859	0.0979908	0
		Col11a1	3.12151	3.87637	3.93258	2.37092	3.68557	3.93248	3.20143	2.66569	3.74158	8.30438	10.5884	11.1811	10.0236	12.7328	11.4824	10.9964	11.2602	15.1657	2.8582	1.4619	2.00542	2.19968	2.16836	1.99351	2.35088	2.89268	1.67689	4.70998	6.18997	7.86418	6.04886	6.94955	7.03981	6.26273	7.71198	6.49792	6.13818	9.2893	10.0561	8.08711	8.24992	7.56314	8.74424	10.5178	8.93354
		Col11a2	5.76113	7.55582	6.66748	4.68306	6.16048	5.49699	5.21383	8.26591	7.14208	5.14845	6.31862	7.58329	7.38249	10.5114	8.54056	7.4665	8.07324	13.4714	7.20296	8.76823	10.1979	8.39752	15.6162	10.7721	7.33962	10.1656	9.74534	7.25628	12.9472	13.3179	9.65854	12.2009	9.64593	8.20273	13.3008	9.51376	9.82141	19.4876	8.28524	6.85652	8.69698	9.99343	8.8538	10.9828	7.32005
		Col12a1	0.899776	0.75583	0.77968	0.853431	0.791911	0.868285	1.02355	1.26003	0.966083	0.834426	0.989346	1.22782	0.766578	0.83841	1.02166	0.878034	0.801209	0.978715	0.391149	0.266082	0.202066	0.353909	0.249073	0.244983	0.56287	0.684579	0.553079	0.906742	1.08929	0.782446	0.725976	0.945455	0.957195	0.933762	0.809502	0.975081	0.887378	0.943944	0.617829	0.856895	0.83083	1.00933	0.944191	0.681012	0.768693
		Col13a1	0.552527	0.680376	0.567146	0.49567	0.744883	0.473661	0.830885	1.16427	0.615792	0.5607	0.707012	1.54786	0.715672	0.977564	1.79361	0.702638	0.555171	0.729769	0.298418	0.243094	0.294813	0.282138	0.339766	0.18515	0.230596	0.923597	0.26865	0.217559	0.236164	0.29013	0.211789	0.314331	0.365817	0.17526	0.237882	0.212049	0.397631	0.620857	0.266668	0.122601	0.236107	0.476251	0.208479	0.496815	0.246105
		Col14a1	0.480865	0.4273	0.293828	0.157327	0.515321	0.220186	0.319584	0.539161	0.226001	0.43808	0.469059	0.405347	0.272222	0.34172	0.350254	0.275413	0.405658	0.420128	0.291071	0.294138	0.52114	0.368694	0.391204	0.293124	0.340997	0.610905	0.231992	0.154078	0.296638	0.144808	0.186879	0.119748	0.177725	0.132172	0.1709	0.183111	0.332607	0.216988	0.320749	0.366114	0.362593	0.217891	0.268567	0.447716	0.326954
		Col15a1	1.64917	1.88998	2.02802	1.37025	1.91713	2.48515	1.58332	2.35294	1.07308	2.77763	2.27607	3.38215	3.02313	3.42708	3.22166	2.26494	3.10259	4.70001	1.4284	0.875566	1.0819	1.51338	1.61332	1.25523	1.03472	2.7955	1.3388	2.28729	3.56073	2.34717	2.05176	2.17616	1.79994	1.6462	2.53531	1.94817	2.0905	3.64902	3.13752	2.31974	2.21334	2.45206	2.46836	3.89137	2.76865
		Col16a1	2.64125	4.71522	4.7189	2.40623	2.61626	4.08236	3.79868	6.40407	7.5534	10.6968	11.8367	16.7342	13.5405	19.2547	16.9415	14.1348	17.6713	25.4271	3.50067	3.86739	3.74362	3.71417	5.50466	4.51174	3.18727	8.8506	4.77839	10.2584	16.5932	21.8476	15.7024	20.5966	15.0133	13.8338	22.9819	15.9295	14.2755	26.4123	13.0587	9.63292	14.531	15.2563	13.1342	19.5752	12.0771
		Col17a1	0.216829	0.191517	0.0292666	0.0217749	0.177931	0.0553992	0.269473	0.485405	0.0158827	0.0124523	0.0840966	0.142492	0.090354	0.0883059	0.0897033	0.0654528	0.0881511	0.125534	0.691306	0.75807	1.09957	0.675098	1.00869	0.863047	0.55601	1.47806	0.565805	0.0240266	0.044315	0.0769206	0.0891665	0.0286212	0.036939	0.0289563	0.136855	0.0234451	0.0673181	0.259355	0.0884661	0.0714833	0.080443	0.0473465	0.0776389	0.0960439	0.0488433
		Col18a1	1.95402	1.80475	1.54915	0.897304	2.71355	1.42264	1.96653	3.38411	1.85355	3.22688	4.30397	6.06611	4.75997	6.97469	6.80505	5.21288	5.6519	7.83294	1.40435	0.940472	1.00329	1.02293	1.57842	1.09075	0.786022	6.19173	1.33529	1.04067	1.50847	1.90215	1.15663	1.33887	1.56107	1.3875	1.35761	1.47799	1.36536	2.58133	2.8949	1.8031	1.91002	1.56161	2.41546	3.2255	2.14062
		Col19a1	2.4206	2.0324	1.98173	1.75071	1.63231	2.11383	2.01346	1.91212	1.88693	0.680008	1.04115	1.18091	1.0271	1.11006	1.06278	1.07635	1.0413	0.98681	1.06287	1.14366	0.907252	1.09462	0.701461	1.1159	1.7084	0.491971	1.13713	0.853497	0.884627	0.923207	1.16117	1.08007	0.942753	1.03709	1.01048	1.20076	0.809504	0.971369	0.899096	0.977199	1.02657	1.08872	1.24291	0.942982	1.07624
		Col20a1	27.4825	34.6405	31.8923	32.1247	30.0994	32.0637	32.1676	36.4368	37.7723	27.8486	28.472	28.541	28.3879	33.0976	31.5901	28.784	34.8772	38.3766	25.278	28.8255	32.7694	28.1062	45.3102	31.4175	28.757	32.0744	27.704	21.5267	25.9959	23.5564	20.1836	22.2903	22.0871	21.6497	24.7256	20.618	20.0027	26.6121	24.9144	22.9404	21.8275	23.9853	21.344	26.2947	22.6869
		Col22a1	1.10131	1.4219	1.90151	1.28783	1.1282	1.00582	1.1213	1.9344	1.1526	0.371645	0.55543	0.502638	0.627584	0.907683	0.83751	0.630096	0.821942	0.920545	0.107728	0.108761	0.0431382	0.0802265	0.0773129	0.0704446	0.188265	0.14309	0.112857	0.432123	1.02211	0.887246	0.711992	0.756512	0.865685	0.663226	0.55944	1.04621	0.433164	0.754549	0.485386	0.665626	0.563768	0.781293	0.613381	0.408054	0.547343
		Col23a1	1.55792	4.37775	2.78762	2.84455	1.89984	6.77934	5.41759	5.44586	4.75003	7.78657	11.1439	12.9768	9.55926	18.5202	16.0827	11.1697	13.704	19.1968	1.93212	0.762757	0.691919	2.77307	1.48927	2.07776	1.86427	1.75524	1.08655	0.747911	2.24788	1.04974	1.09442	1.39114	0.810279	0.776239	1.23683	0.788245	1.16496	2.26897	2.31794	0.865736	0.843553	1.19011	0.982896	1.77446	1.01393
		Col24a1	0.118404	0.313351	0.132562	0.0487415	0.0309765	0.0940825	0.164381	0.187136	0.311964	0.771159	1.0691	1.12997	1.10704	1.3163	1.412	1.24526	1.31192	1.38738	0.337302	0.282075	0.193668	0.471583	0.331031	0.320693	0.811386	0.970481	0.498235	3.13899	5.66041	1.55776	1.02775	1.53863	1.5114	1.32282	1.46149	1.2663	1.53695	1.77119	1.09131	0.899405	0.707543	1.4807	0.923649	1.09594	0.97393
		Col25a1	6.01477	4.8922	5.51218	5.03126	5.35305	8.77281	6.40353	6.13538	4.55701	13.4516	12.4343	12.8473	12.1039	11.4192	11.2867	12.6832	10.8352	12.2245	6.73715	3.33406	3.17992	5.01533	3.32517	3.49914	4.55201	9.6247	3.71868	4.47092	4.9844	2.48504	3.08703	2.86333	3.88869	3.07219	2.14363	3.18879	2.33744	2.36164	5.2287	4.62438	3.32923	2.762	5.1881	5.21165	5.32774
		Col26a1	0.896035	1.10748	1.07171	1.14811	0.692602	1.87447	1.33877	1.44972	1.16477	2.18489	2.64305	2.9173	3.21947	2.9622	3.22011	2.59171	3.89564	3.69958	1.96569	2.21939	2.8188	1.98829	3.3958	2.18957	2.06012	6.12402	1.53418	1.69573	2.15829	2.44984	1.87498	2.4853	2.33306	2.03538	2.46156	1.63824	2.32655	2.72552	2.02501	1.67184	1.73087	1.96117	2.20841	2.90545	1.37323
		Col27a1	0.999071	1.41024	1.20376	0.875582	1.16081	1.31045	1.36746	1.96239	2.34008	1.97535	2.59067	2.94823	2.46556	4.10423	3.34402	2.80312	3.27747	4.07699	2.42597	2.23116	2.07846	2.56817	3.6527	2.57098	2.31191	6.49452	2.94035	3.20043	4.30137	3.46401	4.90532	3.64011	4.10268	2.94062	3.89592	3.06815	3.0331	4.41607	2.19754	2.88751	5.04463	3.658	2.6218	2.22306	1.8122
		Col28a1	0.115838	0.186386	0.0759506	0.160732	0.0532813	0.107839	0.0993376	0.107204	0.144327	0.180276	0.145494	0.1849	0.235868	0.286475	0.181072	0.220312	0.21448	0.217194	0.186682	0.057023	0.0950876	0.130317	0.0758406	0.0688804	0.0857358	0.0789553	0.138385	0.25092	0.172523	0.199631	0.188491	0.136194	0.191747	0.156081	0.209251	0.20285	0.185791	0.277143	0.293371	0.281135	0.292891	0.168966	0.158956	0.28487	0.228185
		Collagen-modifying enzymes
		Col4a3bp	16.157	28.2425	18.0704	22.9599	15.6763	17.0237	21.8248	24.1647	21.4019	25.1467	27.3924	33.8866	27.012	24.3131	22.6185	28.2126	20.3912	30.9347	17.149	14.4424	15.0363	16.9291	22.7385	15.7938	20.8592	23.5639	15.277	30.0111	30.6865	28.8271	33.2823	32.5956	31.8627	34.3689	34.8995	29.9766	37.5711	38.0869	27.2534	30.5836	29.165	26.8083	37.026	29.1451	24.7894
		Colgalt1	13.4085	14.0344	14.2304	13.134	14.3597	14.4555	14.383	16.7036	14.1597	13.4498	12.4716	12.1732	12.3224	12.7687	12.3123	14.7372	14.6711	13.754	13.2435	12.988	15.4694	13.0463	15.7745	13.6523	14.3025	14.0274	13.0356	10.4509	11.2006	10.419	9.31421	9.58709	8.6114	10.0537	10.6547	9.429	8.68447	9.77531	9.55701	11.0461	8.72626	8.83756	9.63057	11.4457	9.80362
		Colgalt2	1.41548	1.70996	1.62732	1.52752	1.26226	1.65308	1.37348	1.25493	1.35762	1.69159	1.38761	1.58467	1.52786	1.54199	1.23013	1.15443	1.43468	1.41878	1.19522	1.28137	1.06008	1.03956	1.24845	1.29585	1.11117	1.19657	1.37404	1.18328	1.35237	1.59094	1.26236	1.2423	1.20245	1.33912	1.29764	1.33568	1.35773	1.42762	1.75975	1.61932	1.81224	1.42884	1.90039	2.3819	1.92119
		Collagen-like molecules
		Ccbe1	6.781	5.74342	6.32071	7.378	6.7527	5.96978	5.90017	5.99874	5.41061	0.543477	0.621406	0.483905	0.766397	0.778404	0.526541	0.491543	0.486066	0.434213	0.221406	0.265269	0.264985	0.422246	0.409498	0.350522	0.375018	0.688414	0.291748	0.33884	0.177676	0.426311	0.523061	0.52806	0.322353	0.354772	0.728715	0.516135	0.723833	0.345599	0.343093	0.24858	0.340681	0.469003	0.185329	0.401245	0.258072
		Colq	0.143681	0.19014	0.232441	0.197896	0.163064	0.110011	0.134985	0.164046	0.0946505	0.0561335	0.0556594	0.0565872	0.192927	0.0657552	0.118748	0.0429162	0.196921	0.110785	0.184134	0.130886	0.291009	0.363035	0.145065	0.252964	0.327067	1.06723	0.571748	2.72685	2.46397	3.60846	2.38972	4.11129	3.96109	4.32756	4.0345	3.63172	2.69311	3.27154	0.56603	1.0183	1.02186	1.48081	0.722233	0.926312	0.698345
		Cthrc1	4.12443	3.42872	1.88494	4.1847	5.00163	3.57159	2.57461	2.24865	2.5147	10.2129	8.97064	9.47183	10.956	8.58338	10.8068	9.55382	9.62803	13.4556	2.82916	1.80776	2.39359	3.53378	3.21521	2.1458	2.06898	13.3655	4.17195	13.2011	14.487	12.3342	11.6318	11.9038	13.7257	13.2374	12.6017	11.3272	9.62927	16.3438	9.22389	14.2234	10.6367	11.9312	11.2853	11.8403	10.2185
		Colec11	0.306516	0.495023	0.129675	0.412134	0.0606471	0.429615	0.288968	0.512504	0.422432	0.29607	0.558928	0.505106	0.364161	0.293471	0.529981	0.458849	0.195305	0.741661	0.441718	0.438116	0.324699	0.199871	0.776926	0.517458	0.48176	0.718963	0.189019	0.385023	0.343652	0.426054	0.317432	0.465067	0.327382	0.348766	0.619264	0.415606	0.359766	0.337989	0.609781	0.578318	0.440064	0.681876	0.360284	0.42558	0.476173
		Colec12	3.66208	3.76344	3.04738	3.59107	3.76255	3.01745	3.32425	3.68207	2.63718	5.09209	6.10562	8.37996	5.82607	5.51982	8.09959	3.82416	4.44155	4.46424	3.12178	3.13865	3.33782	3.21689	2.9378	3.74616	2.99935	5.06915	4.10249	2.82372	2.33207	3.54431	2.6625	3.18319	3.41981	3.24883	3.23198	3.6221	2.71672	3.11843	3.56887	3.14491	2.88725	3.27286	3.57614	2.83386	3.45857
		Genes encoding enzymes that modify procollagen molecules
		Adamts2	2.267	2.71002	2.53399	1.88955	2.05738	2.62428	2.78866	3.38695	3.62338	9.24342	12.2756	14.7691	15.0883	14.9143	14.2206	14.7787	14.2222	15.1402	2.21714	2.31923	2.61867	3.25951	3.38654	2.81857	2.75195	7.40533	2.99156	7.71678	9.21041	7.89546	8.47702	6.40148	6.62856	7.05739	8.32324	6.21425	6.54362	8.42628	8.29584	11.094	10.5332	6.61101	9.12989	8.13461	7.51019
		Bmp1	20.813	22.2087	25.6239	21.6231	24.57	20.4898	21.3721	27.6074	20.743	7.37211	8.08946	8.20526	7.83108	10.9255	9.96931	8.10851	9.8015	13.2256	11.7007	12.3282	13.9797	12.3155	20.495	12.8223	13.4011	17.0588	16.7007	6.26965	7.49514	9.12337	7.18129	8.01348	7.02113	8.13463	8.77464	6.9616	7.16227	9.22152	5.72821	5.557	7.25594	7.13572	6.94019	7.11195	5.97508
		Plod1	6.43217	6.7296	7.07259	6.80241	6.52164	5.84007	5.55678	5.57914	7.24418	8.0913	7.90353	7.9374	8.32932	9.78167	9.25949	8.73458	9.46221	10.6625	7.17437	7.81473	9.10622	7.57258	10.6937	9.48048	8.70692	14.7926	11.8995	14.9061	19.3705	20.403	15.5542	15.8312	13.8198	14.9576	17.9291	15.6345	15.3342	21.5196	10.2438	11.2734	13.2005	14.9737	10.9949	12.8404	10.9178
		Plod2	2.84974	1.85441	1.67847	2.51752	2.41041	1.91016	1.48417	1.33056	1.78356	3.44637	3.56309	3.15584	2.93714	2.70072	2.70636	2.67316	2.17881	1.67148	1.05022	0.730343	0.574298	0.992152	0.509767	0.837403	1.0041	0.907586	0.762819	1.56019	1.56352	1.7952	2.38877	2.28306	2.13324	2.16674	1.53341	2.0552	2.14358	1.56808	1.58103	1.89227	2.0532	2.19827	2.27408	1.36943	1.63343
		Plod3	10.397	11.1936	10.2933	10.3908	9.92377	9.86677	11.4647	13.7286	13.2141	15.313	13.6945	15.0421	16.431	20.7808	18.7311	16.1003	19.0884	23.7755	10.9284	10.6979	12.2498	10.2923	16.0744	11.3145	10.8407	14.8192	12.0985	12.5103	15.6079	14.4925	13.1141	32.8774	11.8521	30.4032	15.4676	27.2265	13.5804	19.0251	31.4191	12.3872	29.4902	11.9612	13.1865	14.5365	11.1239
		Pcolce	10.3979	9.18075	2.63402	4.18201	15.2647	3.63152	6.98466	11.0568	4.04159	2.8002	5.59431	6.80277	5.53119	3.97406	11.0382	3.62503	3.88087	4.25747	2.39321	2.27854	2.81977	2.09563	3.4307	2.40959	4.21444	18.2548	3.4221	2.3086	3.42517	2.85964	2.26585	2.76304	2.71056	2.37196	2.73451	2.0799	2.30268	3.28343	1.61558	1.91848	2.15519	1.89924	1.89522	1.61078	1.87327
		Pcolce2	4.64749	3.55227	2.69781	2.61932	6.92855	2.7847	4.19349	4.76581	2.24663	3.39542	3.56699	3.53125	4.44811	3.21005	4.05075	4.45324	3.57285	3.27396	3.25182	3.74597	4.22124	4.10472	4.84864	5.0209	4.84276	11.3947	4.12189	8.66176	9.49489	10.6267	8.59552	9.62553	8.84645	9.66011	10.3545	8.95395	6.56878	10.7157	6.33044	7.86118	8.76615	8.4966	7.27903	7.32179	7.51404
		P4ha1	12.1791	11.5669	11.2027	9.77928	12.7336	10.276	11.0605	8.73384	10.977	12.0427	12.1008	11.1091	10.5332	11.3455	10.2197	11.0641	10.3753	11.5017	14.6323	15.0653	13.5608	10.9369	14.3693	13.2554	15.7579	10.2645	17.079	8.75239	8.0443	8.14149	6.84419	7.90099	8.11705	7.7588	6.79486	9.17686	8.13993	7.90652	7.85747	7.38354	8.9483	7.87	8.68275	7.56558	8.98428
		P4ha2	4.0189	4.74082	5.27784	3.88065	3.93414	5.3848	5.0829	4.79553	6.28399	9.1427	9.27362	10.049	8.26031	12.113	10.2826	9.73627	10.5243	11.4221	3.99532	4.11731	3.85067	3.51483	5.02551	3.87526	3.85352	8.19455	4.27622	5.03803	6.06818	4.87729	3.53817	4.98975	5.98232	4.57597	5.0434	4.89917	4.82531	5.91104	5.3494	5.58426	5.46529	4.98209	5.05541	5.98616	5.39937
		P4ha3	1.25805	1.23692	0.850554	1.05941	1.06077	1.27476	1.39606	1.52072	1.49127	4.33609	5.83858	5.45958	4.68	6.26513	5.6518	4.76279	5.24491	6.49725	1.19113	1.38361	1.4494	1.47429	1.89102	1.64561	1.31801	3.46926	1.2398	2.84025	3.52626	2.16577	2.34224	2.58825	3.23082	2.28765	2.34286	1.98772	2.68514	2.4386	2.80927	2.38015	2.12109	2.09291	1.89865	2.67231	2.56885
		Note: MRN – midbrain raphe nuclei; HPC – hippocampus; VTA – ventral tegmental area; STR – striatum; HPT – hypothalamus.
		C1, C2, C3 - control; L1, L2, L3 - losers, defeated mice;						W1, W2, W3 - winners, aggressive mice

## Sheet: AHC_HID
8.63501	-0.0752055	1	1	1.875	-0.0752055	1	1
3.25	-0.0752055	2	1	1	-0.0752055	2	1
3.25	0.543659	3	1	1	1	3	1
1.75	0.543659	4	1	1	-0.0752055	4	1
1.75	0.687264	5	1	2.75	-0.0752055
1	0.687264	6	1	2.75	0.0901022
1	1	7	1	2	0.0901022
1	0.687264	8	1	2	1
2.5	0.687264	9	1	2	0.0901022
2.5	0.839097	10	1	3.5	0.0901022
2	0.839097	11	1	3.5	0.108944
2	1	12	1	3	0.108944
2	0.839097	13	1	3	1
3	0.839097	14	1	3	0.108944
3	1	15	1	4	0.108944
3	0.839097	16	1	4	1
2.5	0.839097	17	1	4	0.108944
2.5	0.687264	18	1	3.5	0.108944
1.75	0.687264	19	1	3.5	0.0901022
1.75	0.543659	20	1	2.75	0.0901022
4.75	0.543659	21	1	2.75	-0.0752055
4.75	0.628329	22	1	1.875	-0.0752055
4	0.628329	23	1
4	1	24	1
4	0.628329	25	1
5.5	0.628329	26	1
5.5	0.809242	27	1
5	0.809242	28	1
5	1	29	1
5	0.809242	30	1
6	0.809242	31	1
6	1	32	1
6	0.809242	33	1
5.5	0.809242	34	1
5.5	0.628329	35	1
4.75	0.628329	36	1
4.75	0.543659	37	1
3.25	0.543659	38	1
3.25	-0.0752055	39	1
14.02	-0.0752055	40	1
14.02	0.0901022	41	1
9.3125	0.0901022	42	1
9.3125	0.286039	43	1
7.75	0.286039	44	1
7.75	0.519389	45	1
7	0.519389	46	1
7	1	47	1
7	0.519389	48	1
8.5	0.519389	49	1
8.5	0.637454	50	1
8	0.637454
8	1
8	0.637454
9	0.637454
9	1
9	0.637454
8.5	0.637454
8.5	0.519389
7.75	0.519389
7.75	0.286039
10.875	0.286039
10.875	0.355937
10	0.355937
10	1
10	0.355937
11.75	0.355937
11.75	0.5255
11	0.5255
11	1
11	0.5255
12.5	0.5255
12.5	0.651539
12	0.651539
12	1
12	0.651539
13	0.651539
13	1
13	0.651539
12.5	0.651539
12.5	0.5255
11.75	0.5255
11.75	0.355937
10.875	0.355937
10.875	0.286039
9.3125	0.286039
9.3125	0.0901022
18.7275	0.0901022
18.7275	0.108944
14.75	0.108944
14.75	0.262819
14	0.262819
14	1
14	0.262819
15.5	0.262819
15.5	0.506241
15	0.506241
15	1
15	0.506241
16	0.506241
16	1
16	0.506241
15.5	0.506241
15.5	0.262819
14.75	0.262819
14.75	0.108944
22.7051	0.108944
22.7051	0.127086
17.875	0.127086
17.875	0.45723
17	0.45723
17	1
17	0.45723
18.75	0.45723
18.75	0.636082
18	0.636082
18	1
18	0.636082
19.5	0.636082
19.5	0.668147
19	0.668147
19	1
19	0.668147
20	0.668147
20	1
20	0.668147
19.5	0.668147
19.5	0.636082
18.75	0.636082
18.75	0.45723
17.875	0.45723
17.875	0.127086
27.5352	0.127086
27.5352	0.237543
22.3125	0.237543
22.3125	0.633933
21	0.633933
21	1
21	0.633933
23.625	0.633933
23.625	0.779059
22.5	0.779059
22.5	0.916168
22	0.916168
22	1
22	0.916168
23	0.916168
23	1
23	0.916168
22.5	0.916168
22.5	0.779059
24.75	0.779059
24.75	0.877588
24	0.877588
24	1
24	0.877588
25.5	0.877588
25.5	0.929777
25	0.929777
25	1
25	0.929777
26	0.929777
26	1
26	0.929777
25.5	0.929777
25.5	0.877588
24.75	0.877588
24.75	0.779059
23.625	0.779059
23.625	0.633933
22.3125	0.633933
22.3125	0.237543
32.7578	0.237543
32.7578	0.241722
27	0.241722
27	1
27	0.241722
38.5156	0.241722
38.5156	0.47332
31.9688	0.47332
31.9688	0.646817
28.75	0.646817
28.75	0.733224
28	0.733224
28	1
28	0.733224
29.5	0.733224
29.5	0.894382
29	0.894382
29	1
29	0.894382
30	0.894382
30	1
30	0.894382
29.5	0.894382
29.5	0.733224
28.75	0.733224
28.75	0.646817
35.1875	0.646817
35.1875	0.678483
32.3125	0.678483
32.3125	0.813324
31	0.813324
31	1
31	0.813324
33.625	0.813324
33.625	0.8653
32.5	0.8653
32.5	0.922494
32	0.922494
32	1
32	0.922494
33	0.922494
33	1
33	0.922494
32.5	0.922494
32.5	0.8653
34.75	0.8653
34.75	0.870005
34	0.870005
34	1
34	0.870005
35.5	0.870005
35.5	0.893827
35	0.893827
35	1
35	0.893827
36	0.893827
36	1
36	0.893827
35.5	0.893827
35.5	0.870005
34.75	0.870005
34.75	0.8653
33.625	0.8653
33.625	0.813324
32.3125	0.813324
32.3125	0.678483
38.0625	0.678483
38.0625	0.750446
37	0.750446
37	1
37	0.750446
39.125	0.750446
39.125	0.794942
38	0.794942
38	1
38	0.794942
40.25	0.794942
40.25	0.84129
39	0.84129
39	1
39	0.84129
41.5	0.84129
41.5	0.868346
40.5	0.868346
40.5	0.895808
40	0.895808
40	1
40	0.895808
41	0.895808
41	1
41	0.895808
40.5	0.895808
40.5	0.868346
42.5	0.868346
42.5	0.891222
42	0.891222
42	1
42	0.891222
43	0.891222
43	1
43	0.891222
42.5	0.891222
42.5	0.868346
41.5	0.868346
41.5	0.84129
40.25	0.84129
40.25	0.794942
39.125	0.794942
39.125	0.750446
38.0625	0.750446
38.0625	0.678483
35.1875	0.678483
35.1875	0.646817
31.9688	0.646817
31.9688	0.47332
45.0625	0.47332
45.0625	0.563858
44	0.563858
44	1
44	0.563858
46.125	0.563858
46.125	0.621812
45	0.621812
45	1
45	0.621812
47.25	0.621812
47.25	0.753284
46	0.753284
46	1
46	0.753284
48.5	0.753284
48.5	0.798253
47.5	0.798253
47.5	0.919893
47	0.919893
47	1
47	0.919893
48	0.919893
48	1
48	0.919893
47.5	0.919893
47.5	0.798253
49.5	0.798253
49.5	0.818345
49	0.818345
49	1
49	0.818345
50	0.818345
50	1
50	0.818345
49.5	0.818345
49.5	0.798253
48.5	0.798253
48.5	0.753284
47.25	0.753284
47.25	0.621812
46.125	0.621812
46.125	0.563858
45.0625	0.563858
45.0625	0.47332
38.5156	0.47332
38.5156	0.241722
32.7578	0.241722
32.7578	0.237543
27.5352	0.237543
27.5352	0.127086
22.7051	0.127086
22.7051	0.108944
18.7275	0.108944
18.7275	0.0901022
14.02	0.0901022
14.02	-0.0752055
8.63501	-0.0752055

## Sheet: PCA_HID
	-5.61563	11.6616	10.104	2.54859	2.42943	1.78543	-1.26143	-0.287776	-0.61682	0.217107	-0.357778	1.03782	1.17889	-0.0777921	-0.148937	-0.0774149	-0.216263	0.272392	-0.181868	0.16667	-0.0940838	0.156088	-0.0748843	0.0494087	-0.0860116	-0.219245	-0.00685746	0.0315985	0.0525128	-0.0525153	0.0410629	0.0191634	-0.0097811	-0.00550284	-0.00244692	-0.00193738	-0.022323	-0.00559153	0.00738651	0.00106265	0.000842839	0.00126347	-0.00130809	-3.47819e-05	4.17742	-3.57037	1.8681	0.500198	2.92868
	-3.95642	5.77325	9.01963	0.291345	0.527484	-3.04839	0.591446	0.494534	-0.891264	-0.0626784	-0.223951	0.292198	0.381513	0.111865	0.391615	0.0775298	0.188792	-0.185908	-0.228833	0.0011114	0.181752	0.361958	-0.127806	-0.199099	0.195492	0.0311393	-0.00658897	0.0636939	-0.0496714	0.0353061	-0.0442026	0.0221682	0.0378467	0.0088528	-0.0215292	-0.00494491	0.00792976	-0.00198954	0.0009803	0.00637496	0.00162173	-0.0026192	0.00146715	0.000321975	11.9762	-7.6736	-1.94315	-3.01408	2.64438
	-12.01	3.45805	9.27316	-5.20766	-1.41893	-1.78002	-1.61034	-0.412903	-0.711758	-0.374252	0.180206	0.128059	0.081021	-0.496177	-0.74289	-0.272795	0.288815	-0.106209	0.286328	-0.190928	0.296093	0.00999768	0.104887	0.185024	0.0885583	0.14528	0.0692254	0.0113777	0.0558603	-0.0238466	0.0122003	0.0303596	0.0186532	-0.00442215	-0.00463749	0.0147521	-0.0160203	-0.00188488	-0.00142766	-0.00492002	-0.00630452	-6.74495e-05	-0.000920624	-8.09894e-05	1.41863	-5.43839	-7.65563	5.24842	-7.19253
	-17.4831	2.09655	7.26463	-4.66427	0.380722	0.105054	0.660065	1.21194	0.0952726	-0.165494	-0.643096	-0.255348	0.619479	0.472967	-0.0730032	-0.210083	0.333404	-0.401834	0.0595632	-0.184214	-0.093511	-0.0465486	0.0120041	0.192941	0.0396288	-0.0262996	-0.0832923	-0.0442087	-0.0140624	-0.0798278	-0.0262217	-0.0768816	-0.0283468	0.0167254	0.0119183	-0.00799515	-0.00405434	0.0105046	0.00173404	0.0075101	0.00600019	-0.000343712	0.000691347	5.1412e-05	8.49324	-5.57922	9.89296	1.61108	-1.7339
	-4.96519	13.8625	9.09581	3.91094	1.01015	0.901938	-3.04512	-1.69395	0.0697732	-0.392489	-0.408738	-0.325666	0.890753	0.219411	0.144895	0.0748007	-0.0989982	0.226586	0.0352692	-0.272017	-0.193399	-0.199777	0.0629244	-0.14535	0.0219295	0.0815265	-0.00632043	-0.0714304	-0.0643006	0.0510212	-0.0371074	-0.0112202	-0.00758344	-0.0238924	0.00362513	-0.00449742	0.0186247	0.000822573	-0.00990793	-0.00779299	-0.000723996	7.2553e-05	0.000603007	-0.000164058	11.8966	6.35184	3.79627	0.103513	-1.51904
	-5.74401	3.07886	6.21425	-5.96978	2.35426	-3.37195	2.20929	-1.45723	3.56201	-0.112939	1.13138	-0.13241	0.28669	-0.301704	-0.403264	0.426138	0.0731578	0.0356714	-0.128454	0.157677	-0.068482	0.04156	-0.0692845	0.0282616	0.0466677	-0.00548414	-0.0200158	0.0466376	-0.000402286	-0.00505984	0.00462536	-0.00840588	-0.00839868	-0.0143491	0.0121402	0.000554292	0.0122816	-0.00239021	0.00572601	-0.00358363	-0.00178519	0.000810382	0.000760081	-0.00036255	4.72714	9.92153	-0.597785	4.18562	5.38182
	-3.87121	10.3505	9.99203	0.0429255	-1.71133	0.0748516	0.0182082	0.156588	0.266394	0.0679218	0.00534738	-0.12781	-0.559084	-0.31931	0.291518	-0.373866	-0.127397	-0.12839	-0.266715	0.189693	-0.213605	-0.0457354	-0.0493544	0.0796804	-0.275485	0.182307	-0.0164967	-0.0197624	-0.0080819	0.0313813	-0.0273745	0.0320823	-0.0088536	0.0191825	-0.00964572	0.0245135	0.00528088	0.0155508	0.00889986	0.00601044	0.000134137	-0.00114699	-0.00125342	-0.000134685	11.9778	-5.86764	-1.18613	1.33602	2.5286
	11.9432	16.072	14.0551	6.41165	-3.32107	-1.95403	1.27777	-0.084085	-0.54226	0.840088	0.163452	-0.243414	-0.732193	0.220824	0.582088	0.316164	-0.0814164	-0.131899	0.439962	0.171582	0.24354	-0.126771	-0.00287358	-0.00251944	-0.0201407	-0.0861919	0.0368294	-0.0187456	0.035614	0.0356623	0.0295072	-0.0213452	0.00834076	-0.00927471	0.0180227	-0.00149936	-0.00272312	-0.00410612	0.00363792	-0.0046992	0.00452901	-0.000324629	0.000145827	-0.000275777	8.86295	-11.0575	-3.06518	1.73354	-2.76992
	-4.54137	4.72471	9.38633	-4.30261	-4.0939	-1.63345	1.84966	1.24811	-0.527232	-0.239312	0.275948	0.395553	-1.11192	0.160237	-0.186187	0.031722	0.00529965	0.326978	-0.259121	-0.251849	-0.23321	-0.0985213	0.145504	-0.170815	0.0195516	-0.0247261	-0.031714	-0.0244022	0.0294928	-0.0353991	0.0239333	0.00301831	-0.0183621	0.00723709	-0.010843	-0.0237279	-0.00334735	-0.00549241	-0.00922881	0.000943602	-0.00492771	0.00292153	-0.000719929	0.000377988	-4.0467	10.0497	-8.00916	6.37851	-0.612907
	11.0575	2.67835	-1.30263	-3.8913	3.5911	2.34535	-1.61439	0.142024	-0.12475	0.257265	0.309628	-0.0227335	-0.0448889	-0.707437	0.238694	0.607026	0.48289	-0.15937	-0.106277	0.111459	0.181732	-0.320146	-0.104866	-0.166006	-0.137875	0.0615147	0.0469322	0.042725	0.00967248	-0.0816879	0.0119529	-0.0294176	0.00358769	0.00228602	-0.0205507	0.00100583	-0.0052854	-0.0108903	-0.007992	0.00399612	0.00184564	0.00108886	0.000440273	0.000412888	14.5348	2.72363	-2.00131	0.243934	1.70954
	19.7948	4.11735	-1.08011	-3.052	1.04485	1.60855	-0.192974	0.436186	0.249558	0.653007	-1.328	-1.14687	-0.293434	-0.232606	-0.0337869	-0.0572	0.0409976	0.221145	-0.0742577	-0.194366	-0.0368315	0.0710443	0.236133	-0.0984869	0.0251395	-0.051303	0.109014	0.17696	0.0648866	-0.0205298	-0.0108268	0.00205482	0.00321135	-0.0151504	0.0273675	0.0112078	0.0088157	0.00421117	0.00473062	0.00962489	0.000553545	-0.00155667	-0.000673914	-0.00041655	-2.88343	5.60307	11.7896	-3.84109	-1.2372
	39.0974	3.30573	0.543015	-2.60107	1.66575	4.77051	2.33934	0.741979	-0.769253	-0.274942	0.619109	-0.112611	0.472057	-0.684494	0.389589	-0.426568	0.207362	0.251758	0.205351	0.233141	-0.16166	0.106965	0.0670283	0.0133987	0.13146	0.147263	-0.00826313	-0.015746	-0.0901503	-0.00930607	0.0268782	0.000751298	-0.0100869	-0.00654396	0.00521554	-0.0116776	-0.0009925	0.00201532	0.00415192	-0.00722917	0.00103526	6.20301e-05	-0.000962394	0.000169439	12.6011	5.37048	4.42994	0.812824	-2.7578
	20.8877	1.01155	-2.35818	-4.14241	0.606471	0.689642	-0.99531	1.65414	0.243344	-0.905411	-0.400295	-0.654923	0.168555	0.279724	0.341327	0.170958	0.0248469	-0.241961	-0.121808	0.232714	-0.0318475	-0.0109609	0.0106679	0.0808064	0.0699428	-0.0643336	-0.12488	-0.0220167	0.199222	0.0974071	-0.00489548	-0.00470038	0.00167959	-0.023845	-0.0158992	0.001688	0.0020251	0.00695811	-0.00321703	-0.0076317	-0.00560574	0.000863011	-0.000951212	0.000228423	13.7229	1.01593	1.17423	0.969722	-1.52534
	33.9581	0.444745	-3.73725	-4.38157	-1.53126	-1.48984	-2.00277	-1.19582	-0.327421	-0.162857	-0.129542	0.347634	-0.327615	0.751979	-0.0781449	-0.193499	0.0404273	-0.608999	-0.0585328	0.13318	-0.0369543	0.163283	-0.0755969	-0.0827617	-0.0689291	-0.00503894	0.0481174	0.0125618	-0.102216	-0.0386619	0.0282244	0.0080865	-0.0115006	-0.0142744	0.0292939	-0.0156486	0.00563635	0.000609368	-0.000900313	0.000333504	-0.00556647	0.0020954	-0.00278852	5.6079e-05	3.27225	-0.689052	12.9248	-0.793611	-3.87154
	46.0947	7.59449	-0.993317	-3.32301	-2.10491	5.07549	2.25868	-1.46505	-0.343096	-0.290096	0.756338	-0.45463	0.319849	0.570614	-0.50409	0.16944	-0.252315	-0.0774191	-0.0890169	-0.32975	0.172701	0.1024	-0.0538971	0.0576047	-0.118383	-0.0427984	0.0182229	-0.0539728	0.0284493	0.0185244	-0.0223726	0.00326542	0.0195352	0.0195057	-0.0116221	0.00531459	-0.00193081	-0.00594197	-0.0043954	0.00246354	0.00096593	-0.000539111	0.00207208	-0.000131354	13.1897	3.20746	-0.988993	-6.03772	-1.27526
	17.2152	0.759413	-1.83437	-3.34829	0.226136	0.758635	-0.968778	1.49709	0.547644	0.474538	-0.438691	1.12625	-0.19229	0.118613	0.0854776	0.0325359	0.0972236	0.252256	-0.216567	-0.165231	0.266469	-0.296073	-0.111213	0.230017	0.0717935	-0.0382555	-0.0232196	0.0378511	-0.128201	0.117649	0.0193619	0.00829861	0.00283946	0.0121997	0.00629463	-0.00528717	0.00427723	0.00202931	0.00607423	0.0021087	-0.00170863	0.00116127	0.000770562	-0.000562504	3.66672	-9.26715	-2.38043	3.22519	-3.81974
	25.8698	1.40828	-3.47945	-3.84546	-0.107222	-2.56831	-2.79338	0.509025	0.987506	-0.600524	0.392131	0.281305	-0.608771	-0.345174	-0.0717753	0.097451	-0.00618655	0.095404	0.250364	-0.0577747	-0.0975395	0.181191	0.242604	-0.0374445	-0.0422389	-0.126193	-0.170312	-0.0641608	-0.0808548	-0.0120619	0.0032981	0.00258795	0.00781343	0.00366086	-0.0174448	0.014511	-0.00313775	-0.00777038	0.00463092	0.0017779	0.00696371	-0.00330601	0.000376129	-1.21778e-05	11.9784	4.97955	-0.669853	-4.09427	3.85001
	44.2042	-0.89218	-6.25625	-2.19481	-1.75112	-5.27262	-0.00472063	-0.290671	0.318735	1.12896	-1.11057	0.597194	0.254036	-0.0789645	-0.194786	-0.192885	-0.222806	0.240544	0.126782	0.107534	-0.168551	-0.127136	-0.205478	-0.0141748	0.0920743	0.061391	0.0940226	-0.0577865	0.0802501	-0.0538397	-0.0405205	-0.00494829	-0.00974878	0.0133488	-0.00800913	0.00458687	-0.0049925	0.00470716	-0.00236288	-0.00236512	0.00180111	-0.000118592	0.00191273	0.000343368	8.31881	1.14839	-9.68946	5.75601	0.1662
	-19.1601	6.96052	-6.40089	-3.02013	1.27319	-0.15065	0.530782	0.601633	0.959048	-0.085772	0.173276	0.150279	0.238837	0.920942	0.469925	0.0856037	-0.0479732	-0.0451483	-0.0211145	-0.0051212	0.011929	-0.0608205	0.0981875	0.0936539	0.0283637	0.0573543	0.112658	0.0259003	0.0156215	-0.0126246	-0.00126929	0.0647493	-0.0361119	0.0160232	0.000880258	0.00190279	-0.00442121	-0.0199723	-0.0134864	-0.00584691	0.00688626	-0.00435567	-0.00320644	0.000105521	4.60414	-5.58127	-7.62868	8.21801	-3.05438
	-22.8236	10.4843	-6.98199	-2.05965	-1.18354	0.47447	-0.335203	0.602592	-0.807756	-0.364393	-0.440514	-0.228152	-0.155765	-0.315497	-0.61587	0.155288	-0.158446	0.0901101	-0.0452355	0.101157	-0.0903298	-0.00720889	-0.198721	-0.0491393	-0.0133148	0.0951694	-0.155646	0.00808568	0.0391045	0.000435185	0.0147482	0.00117337	0.0611175	0.0249198	0.0392615	-0.01095	0.00540182	-0.00693612	-0.00396008	-0.00604264	0.00608158	-0.000668802	-0.00135634	-0.000208781	5.57505	-10.5758	-1.27052	-2.10263	4.32389
	-19.7435	13.7044	-9.08839	-0.482919	-1.57857	0.226209	-1.15748	-0.490242	-0.89299	-0.0121044	0.132537	-0.0807096	-0.545831	-0.687165	0.226527	0.403	-0.28333	0.0702432	0.0647615	-0.125425	0.0900257	0.295386	-0.087419	0.197451	-0.0295588	0.0520011	0.0202167	0.0521855	0.0215355	-0.00434193	-0.0275972	-0.0186367	-0.0627315	-0.00743562	-0.00920552	-0.0261565	0.00935017	-0.000960599	0.0074853	-0.00201072	-0.00118377	0.000106033	0.00190536	0.000160787	11.8258	-2.73086	-5.03172	-3.61746	-0.745837
	-19.7281	8.09155	-7.36838	-2.92426	0.561747	0.451508	-0.849485	-0.69192	1.35929	-0.374484	0.596994	0.0900058	0.0419073	0.656277	0.604081	-0.0726504	-0.00142418	0.343152	0.173825	0.067054	0.152388	0.0574964	0.104246	-0.10821	-0.0324744	0.0497053	0.0333581	-0.0122229	0.0258288	0.00344454	-0.0183347	-0.0107464	0.0362634	0.0252691	0.0106167	-0.0122314	-0.0289822	0.0236445	0.00522442	0.00597987	-0.00304422	0.00305562	0.000871229	0.000273634	12.817	3.54831	1.29825	-1.75551	-0.69398
	-16.2259	13.0054	-14.333	0.927185	-2.9685	-2.37229	2.28874	-0.491252	-0.674624	0.789372	-0.1873	-0.123826	0.678479	-0.363005	0.125912	0.0661042	0.539235	-0.16004	0.0568604	-0.18489	-0.194895	-0.0867584	0.0100449	-0.0149131	-0.086681	-0.0685758	-0.0724363	-0.0398814	-0.0329758	0.0518314	-0.000111455	0.0430766	0.00470092	-0.0390589	0.00195415	0.00610308	-0.0141356	-0.00123071	0.00234203	0.0050178	-0.00183376	0.00107682	0.000521205	7.586e-05	11.0689	4.08833	4.89145	-1.25745	-4.54992
	-21.4055	9.99217	-8.65462	-1.72735	-0.886493	-0.661233	0.595872	0.911883	-0.402194	-0.307966	-0.118069	-0.0729221	0.595167	0.189045	-0.102143	-0.321995	-0.102053	-0.0727723	0.110556	0.0848607	0.108057	-0.0735193	0.0633501	-0.197409	-0.0100008	-0.047886	0.0809098	-0.0367407	0.001404	-0.0264578	0.0482871	-0.0273943	-0.00721705	0.03142	-0.0258258	0.0118406	0.0305333	-0.0062421	0.0159784	-0.00384024	-0.00483846	0.000534604	0.000204309	-0.000845822	13.7466	0.701015	1.77963	-3.24883	-2.1767
	-21.8658	7.91481	-2.8364	-1.17588	-0.572927	0.849023	0.214497	-0.0761809	0.575296	1.00725	-0.292598	-0.153561	-0.291972	-0.146803	0.0140585	-0.436629	-0.170619	0.0415047	-0.206126	0.141636	0.117157	0.174752	0.0628149	0.109865	0.00131694	-0.0628947	0.042469	-0.0242484	-0.0732352	0.00179392	0.0491008	-0.0422749	0.0215924	-0.0164789	-0.00369155	0.0220251	0.00857429	0.00588859	-0.0250732	-0.00485626	-3.22981e-05	0.000604117	0.00213641	0.0009078	10.6517	3.53464	2.01268	8.93295	1.84643
	19.2047	17.0617	-5.89363	22.0099	3.75879	-0.438038	0.189141	0.934177	1.15337	-0.61728	0.205581	0.112774	-0.382742	-0.0105909	-0.482021	-0.114256	0.153008	-0.162623	-0.105628	-0.0650221	0.00699306	-0.00506799	0.049327	0.0482067	0.0679756	0.0385468	-0.00224317	0.0108712	0.0105627	-0.0370503	-0.00162719	-0.0028273	-0.00172509	0.0120802	-0.000191782	-0.00172134	-0.00336387	0.00127188	-0.00199295	0.00194807	-0.00264769	0.000546181	-0.000178586	0.000137128	4.57902	-11.9937	0.449187	3.71771	-0.731971
	-17.3164	6.52038	-3.67233	-1.99545	-0.619864	2.46217	0.00183049	-0.909165	-1.08011	-0.563187	1.12363	0.312047	-0.684791	0.0902478	-0.345868	-0.206991	-0.27066	-0.0771203	0.0434745	0.248195	-0.126637	-0.275934	-0.0895974	-0.0322056	0.224083	-0.115195	0.0232234	0.0574568	-0.0321326	-0.00214033	-0.0590993	-0.0135102	-0.00431422	-0.0272675	-0.0094064	0.0133518	-0.0076783	0.00619927	-0.00108156	0.00837085	0.00116318	-0.00173144	-0.00140314	-0.000262634	9.61194	4.1329	2.85328	9.90184	2.99951
	-9.52014	-10.5617	0.486147	1.08439	-0.406754	2.6209	-0.905351	1.74822	0.400962	1.01221	0.825435	0.299674	-0.121565	0.279722	0.281761	-0.0930796	-0.274407	-0.236932	-0.104857	-0.113001	-0.06057	-0.0396963	0.0224216	-0.0120725	0.0273522	0.0573331	-0.0287001	-0.0365454	0.0282352	-0.118081	-0.0118007	0.0395277	0.027109	-0.0378238	0.0101149	-0.00180611	0.00143651	-0.00391296	0.00996039	-0.00602317	-0.00101272	-0.000265184	0.00540882	-0.000375071	13.5952	-2.73054	-2.19266	3.70843	-2.24667
	0.348728	-12.8992	-0.0110967	3.97822	-4.13269	-0.554733	-2.28068	1.03887	-0.189042	1.97638	1.98845	-1.00694	0.630433	0.0619527	-0.379514	-0.0441012	0.168951	0.0832097	-0.0753069	0.0551656	-0.0769668	0.0795352	0.000499784	-0.0266839	0.0184715	-0.0136099	0.0214933	0.015529	0.0119743	0.0666622	-0.0063337	-0.0168173	-0.0144045	0.0230193	-0.000528769	-0.00700221	-0.00107306	0.000816003	-0.00204865	0.00160206	0.000770184	-6.48465e-05	-0.00225633	-2.04247e-05	13.0094	4.37626	1.16656	-2.81754	-0.888085
	-1.01838	-11.8955	-0.139699	1.47168	-2.10276	-0.0109852	0.322078	0.343008	-0.514088	-1.03119	0.374359	0.715872	0.439301	-0.62403	-0.173966	0.290574	-0.0873483	-0.202411	-0.0517396	-0.0595033	0.141412	-0.0845381	0.116871	-0.118161	-0.0018757	-0.0913615	0.0687624	0.00882037	0.0166176	0.0202225	0.00398105	0.0394802	-0.0290105	0.0153849	0.0247174	0.00968239	0.0123128	0.0294669	-0.000561686	-0.0060772	0.0064381	0.00179778	0.00144516	0.000757662	2.81286	5.00291	10.7681	1.2625	-4.81202
	-9.46347	-10.4359	-0.689644	1.57903	-0.18131	2.09526	-0.201115	-0.904109	0.513609	-0.124747	-0.0820351	1.02356	-0.298549	0.109512	-0.163865	-0.328709	0.257428	0.114653	-0.0198895	0.0292319	0.102334	0.0790031	0.0131176	-0.036033	0.0156851	0.0899052	0.0508146	-0.125609	0.123	0.0724381	0.0184728	-0.0161593	-0.00563224	-0.0289617	0.00949558	-0.00287944	0.018504	-0.0176418	0.00898033	0.0147629	0.0056908	0.000556875	-0.000650468	0.000476272	11.0849	-0.915124	5.19394	-1.7344	-6.39002
	-3.98524	-11.6444	0.236019	2.66887	-3.55198	0.566386	0.371652	0.0904939	0.901657	-0.551729	-0.53657	-0.114614	0.276183	-0.309773	-0.133071	0.0780678	-0.0848861	0.0316689	0.0144536	0.0673556	0.0706733	-0.0752204	-0.0510607	-0.0249775	-0.070211	-0.0122287	0.050141	-0.0352039	-0.0166314	-0.00945489	0.0445968	-0.00417108	0.00783811	-0.0166427	-0.00899655	-0.0292037	-0.00703172	0.0148308	-0.00501913	0.00513987	-0.00426866	-0.0109868	-0.000117195	-0.000219033	11.4312	-7.81728	-3.86509	1.45052	-3.41716
	-7.01349	-10.7367	0.883117	2.52317	-1.89539	1.24968	-0.202967	0.119748	0.862538	-0.534363	-0.374489	-0.246527	-0.288052	0.362558	-0.0505293	0.00687028	0.188971	0.0228583	0.299577	-0.151978	-0.262625	0.0869966	-0.208097	0.0671282	-0.0291162	-0.00689215	0.0862318	0.0967325	-0.0102502	-0.0049455	0.0378602	0.0200232	0.027606	-0.0146269	-0.0386749	-0.00657875	0.00818352	0.0125207	-0.0031341	-0.00232076	0.00774426	0.00518991	-0.000722559	-0.000368171	-6.32107	9.40958	-9.13381	-0.825445	-2.76321
	-10.4773	-10.8465	1.8532	1.20864	-1.29065	1.42312	0.121836	0.799652	1.00499	-0.730441	-0.380048	-0.404634	-0.246758	-0.381655	0.198149	-0.161482	-0.0239023	-0.0512511	0.039976	-0.201746	-0.124246	0.0123747	-0.192331	-0.0498812	-0.036019	-0.110205	0.128549	-0.00852601	-0.054406	0.0385786	-0.0460373	-0.0273718	0.0113638	0.0105613	0.013099	0.0117156	-0.0165553	-0.0220096	0.0132786	-0.0106225	-0.00446035	-0.000640866	-0.00121501	0.000950829	4.15039	10.7917	-7.03707	-3.77456	-3.87988
	-1.78244	-12.6879	-2.25074	2.87407	-3.562	0.278906	0.716001	-1.04678	0.298677	0.191696	-0.913718	0.270318	0.163594	-0.581406	0.188754	0.282186	-0.246501	-0.228772	-0.311744	0.113621	0.0852497	0.0311705	0.286079	0.0415407	0.0628081	0.0507532	0.0242526	-0.0467514	-0.0312002	-0.00952736	-0.0385098	-0.026948	0.0207262	0.00117781	-0.0136159	-0.00790409	-0.0159346	-0.00586661	4.68138e-06	-0.0041439	0.00321486	0.0039915	-0.00316031	-0.000964991	9.55627	-5.24402	-1.56491	-3.18276	3.37241
	-6.62129	-10.3927	2.99925	1.75112	-1.23686	1.79874	0.108968	0.624606	0.28911	-0.293868	-0.428126	0.391028	0.271702	-0.249283	0.0915817	0.219246	-0.117168	-0.091133	0.399703	0.243489	-0.173929	0.0800502	0.0251431	0.014921	-0.0120724	-0.00233141	-0.0289027	0.0308139	-0.0111113	0.031043	-0.0176372	0.0187833	-0.0145583	0.0288658	0.0133698	0.00675505	0.00347032	-0.0165385	-0.0201221	0.0140577	-0.00733675	0.00239548	0.00343201	-0.000470443	-6.13867	8.45096	-7.09397	-3.38008	-0.857742
	-5.82921	-9.27307	0.0404769	2.56605	-0.969189	1.61406	-0.291183	-1.23485	-0.0813883	0.10662	-0.423084	-0.898643	-0.410405	0.0987758	0.401459	0.397749	0.147911	0.227145	-0.100529	-0.0960765	0.118854	0.0844037	-0.21443	-0.0204273	0.192048	-0.0124926	-0.105983	-0.119644	-0.0121624	-0.0826466	0.0418982	0.0282691	-0.0309635	0.0157385	0.00657403	0.0276401	-0.00154529	0.00738481	0.00149983	0.00295861	-0.0028042	0.000302306	-0.00186467	-0.000232416	4.18503	8.92212	-9.6164	-4.96503	0.460675
	9.25976	-14.0318	-2.3495	4.45023	-3.89448	-2.41957	0.240041	-1.89624	-0.776065	-0.755778	0.565411	0.345382	0.403196	0.254213	0.643363	-0.3137	0.0160694	0.159527	-0.0989063	-0.0864373	-0.0191456	-0.143798	0.0502335	0.117748	-0.0349329	0.040369	-0.144052	0.177626	0.0397092	-0.0424776	0.0233128	-0.0342056	0.0123992	0.00626377	0.00266799	0.010304	0.0084903	-0.00993837	0.00127103	-0.00139035	-0.00122349	-0.00148335	0.000616771	0.000355751	13.2204	0.353703	-1.74184	-5.34207	1.50436
	-1.17531	-8.88575	-1.30721	-0.561364	5.85947	-1.78485	0.92231	0.70654	-0.450515	0.226956	0.233137	0.390064	0.0485825	0.0412139	-0.0142002	0.0504454	-0.535708	-0.171215	0.0789444	-0.321647	-0.0176287	0.0865909	-0.0844738	-0.178217	-0.0272566	0.150979	-0.0467343	0.0383226	0.00576394	0.0776521	0.0524643	-0.0417652	-0.0258264	-0.017099	4.70301e-05	0.0167959	-0.0245845	0.00430289	-0.00362198	0.00106879	0.000803874	-0.000199438	-0.000835126	-0.000401373	12.0566	3.44769	-4.98019	-4.26161	-0.752527
	-6.36253	-7.5371	0.0763014	-0.0415259	5.65567	1.45661	1.14513	-0.659373	-0.15184	1.42738	0.0978324	1.09536	-0.273214	-0.172267	0.14758	0.0595149	0.034736	-0.0571133	0.271457	-0.186139	-0.0189384	0.0276325	0.0277215	0.0346328	-0.0624472	-0.0905827	-0.0740552	-0.0112782	0.0389103	-0.025038	-0.0472026	0.00211484	0.0261604	0.0148994	-0.00486039	-0.006395	0.0248766	0.0115828	-0.00381544	-0.00470096	-0.00538149	-0.00183977	-0.00469446	0.000173729	6.86371	6.83692	3.91915	9.54423	4.41856
	-7.67805	-9.3367	-0.617291	1.13497	2.78156	0.548491	0.206575	-0.891978	-1.50225	0.0755307	-0.378044	0.44249	-0.658371	0.732386	-0.377965	0.360592	0.60252	0.148954	-0.127636	0.224845	-0.216292	0.117941	0.098022	0.00760085	-0.0553899	0.0122285	0.0624967	0.0034841	-0.0021956	0.0422412	-0.0074653	-0.02034	-0.0094311	0.0106355	0.00219188	0.00845889	-0.0101029	0.00404647	0.00342748	-0.0132679	-0.000619301	-0.00304935	0.00375118	-0.000503292	4.20896	10.8137	2.74535	8.69114	1.50354
	-3.72563	-9.02545	0.653493	2.07795	-0.52399	-0.413604	1.12691	1.29351	-0.195651	-0.0339977	-0.630317	-0.412816	0.244474	0.741755	-0.626771	0.175217	-0.111145	0.354024	0.144876	0.24261	0.375894	-0.0142348	0.0238329	-0.0414789	-0.140643	0.0656616	-0.114275	0.0349805	-0.0864149	-0.0368653	-0.0542962	0.00802597	-0.019177	-0.0350893	-0.00669501	0.00474367	0.00317053	-0.00159548	0.00411243	-0.000894374	-0.000651013	0.00184432	-0.00149525	0.000580664	2.81676	-5.63087	-0.120503	0.657713	9.15061
	-4.57768	-8.93165	0.720346	-0.12221	3.76045	-0.769412	0.159165	-1.23139	0.220738	0.00967352	-0.216186	-0.848562	-0.44799	-0.381303	0.0238068	-1.02903	0.109012	-0.0529262	-0.0338813	0.0283979	0.267911	-0.0704238	-0.0645474	-0.112776	-0.0537532	-0.103653	-0.0955927	0.00729703	0.0260667	0.0235177	-0.0211029	0.0331776	-0.0300479	0.0111357	-0.00312003	-0.0218857	-0.00801646	-0.00450314	-0.00692359	-0.00562524	0.00321607	0.00110954	0.00222927	-0.000581257	13.9369	-1.5262	-4.12532	-3.05973	-0.169519
	3.67046	-9.63278	-0.932051	-0.0139099	5.49874	-5.14224	0.262019	0.880094	-1.74863	-1.07083	0.812795	-0.744729	0.0727538	-0.134102	0.293715	0.0642391	-0.0925573	0.264352	-0.113416	0.00308995	-0.0150039	0.00262993	-0.02599	0.18755	-0.0834842	-0.0629527	0.149177	-0.10318	-0.0174906	-0.0288309	-0.0129916	-0.000120962	0.0286083	-0.014065	0.0120166	-0.00261829	0.00932139	-0.00149897	-0.00562675	0.0070378	-6.62232e-05	0.00133752	-0.000487232	-0.000433227	2.43392	7.97428	1.54969	12.0441	0.924283
	-6.92031	-6.48621	1.67215	-0.462078	4.61173	-0.394752	-0.0153152	-1.37569	-0.558512	0.571171	-0.52122	-1.03182	-0.0812505	0.155704	-0.273229	0.228473	-0.387546	-0.222689	0.0453756	0.0876473	-0.164285	-0.201559	0.158255	0.101803	0.0879523	0.0203012	-0.0105372	0.000553673	-0.0421475	0.0364059	0.0491712	0.0299707	0.0148204	0.0214107	-0.0134439	-0.0149049	-0.00026475	-0.00445934	0.0143824	0.0057342	-0.000275653	0.000520755	0.00146032	0.00114515	5.10457	-0.0749114	0.177599	0.625522	5.5832
																																													3.32181	-0.381302	-4.81524	4.15793	1.02245
																																													11.7101	4.35952	-1.43095	-2.08108	1.78531
																																													1.2885	13.3399	0.67299	-2.37456	-1.93419
																																													2.01667	-5.36411	3.49963	-2.92455	9.17836
																																													-2.67322	-11.387	-0.151464	5.97298	-5.35017
[truncated: 39 more columns]
